# Supplementary material for: Elevated Expression of HSP72 in the Prefrontal Cortex and Hippocampus of Rats Subjected to Chronic Mild Stress and Treated with Imipramine
Source: Int J Mol Sci. 2023 Dec 23;25(1):243. doi: 10.3390/ijms25010243 (PMC10779295; doi:10.3390/ijms25010243)

Elevated expression of HSP72 in the prefrontal cortex and hippocampus of rats subjected to chronic mild stress and treated with imipramine

Bielawski A.<sup>1</sup>, Zelek-Molik A.<sup>1</sup>, Rafa-Zabłocka K.<sup>1</sup>, Kowalska M.<sup>1</sup>, Gruca P.<sup>2</sup>, Papp M.<sup>2</sup> and Nalepa I.<sup>1</sup>

<sup>1</sup> Department of Brain Biochemistry, Maj Institute of Pharmacology, Polish Academy of Sciences, Kraków, Poland;

<sup>2</sup> Behavioral Pharmacology Laboratory, Maj Institute of Pharmacology, Polish Academy of Sciences, Kraków, Poland;

Western blot images corresponding to Figures 2B., 3B., 4B.

After protein transfer and membrane staining with PonceauS, membranes were cut horizontally on ~62 kDa, then Hsp72 and Hsp90B were assessed on the upper piece while loading control (beta-actin or alpha-tubulin) on the bottom part. The molecular weight of studied proteins was checked in the initial experiment (performed for validation/optimization of the amount of Ab/protein taken for the experiment) using molecular markers (BioRad). Only good-quality bands were taken for analysis.

**Fig. 2B. Hsp72 protein**

Prefrontal cortex

Gel #5

|                 |          |            |          |                 |                     |          |            |          |                 |                     |
|-----------------|----------|------------|----------|-----------------|---------------------|----------|------------|----------|-----------------|---------------------|
| band# from left | 1        | 2          | 3        | 4               | 5                   | 6        | 7          | 8        | 9               | 10                  |
| group           | sham/sal | stress/sal | sham/IMI | stress/IMI resp | stress/IMI non-resp | sham/sal | stress/sal | sham/IMI | stress/IMI resp | stress/IMI non-resp |
| sample#         | 11       | 21         | 31       | 41              | 51                  | 12       | 22         | 32       | 42              | 52                  |
| band# from left | 11       | 12         | 13       | 14              | 15                  | 16       | 17         | 18       | 19              | 20                  |
| group           | sham/sal | stress/sal | sham/IMI | stress/IMI resp | stress/IMI non-resp | sham/sal | stress/sal | sham/IMI | stress/IMI resp | stress/IMI non-resp |
| sample#         | 13       | 23         | 33       | 43              | 53                  | 14       | 24         | 34       | 44              | 54                  |
| band# from left | 21       | 22         | 23       | 24              |                     |          |            |          |                 |                     |
| group           | sham/sal | stress/sal | sham/IMI | stress/IMI resp |                     |          |            |          |                 |                     |
| sample#         | 15       | 25         | 35       | 45              |                     |          |            |          |                 |                     |

Hsp72 (Ms) ~70 kDa band indicated by the blue arrow

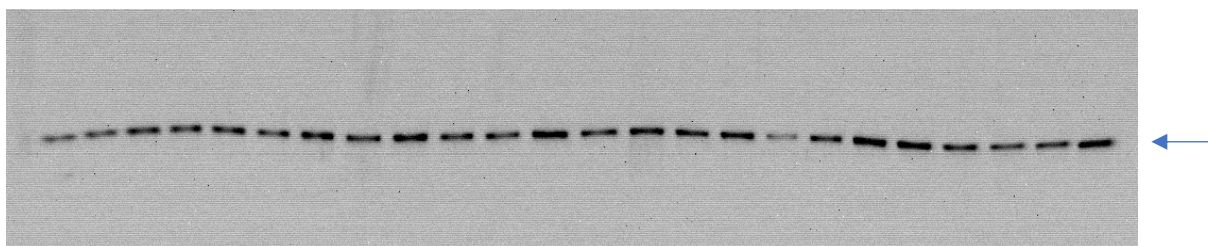

alpha-tubulin (Ms) ~55kDa band indicated by red arrow

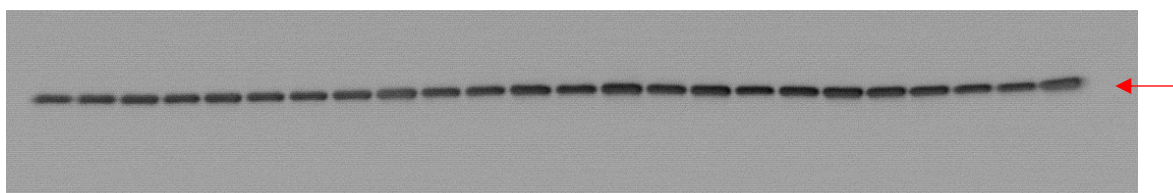

## Gel I#6

|                 |          |            |          |                 |                      |          |            |          |                 |                      |
|-----------------|----------|------------|----------|-----------------|----------------------|----------|------------|----------|-----------------|----------------------|
| band# from left | 1        | 2          | 3        | 4               | 5                    | 6        | 7          | 8        | 9               | 10                   |
| group           | sham/sal | stress/sal | sham/IMI | stress/IMI resp | stress/IMI non- resp | sham/sal | stress/sal | sham/IMI | stress/IMI resp | stress/IMI non- resp |
| sample#         | 16       | 26         | 36       | 46              | 56                   | 17       | 27         | 37       | 47              | 57                   |

  

|                 |          |            |          |                 |                      |
|-----------------|----------|------------|----------|-----------------|----------------------|
| band# from left | 11       | 12         | 13       | 14              | 15                   |
| group           | sham/sal | stress/sal | sham/IMI | stress/IMI resp | stress/IMI non- resp |
| sample#         | 18       | 28         | 38       | 48              | 58                   |

Hsp72 (Ms) ~70 kDa band indicated by the blue arrow

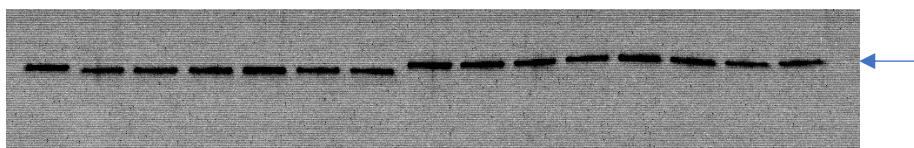

alpha-tubulin (Ms) ~55kDa band indicated by red arrow

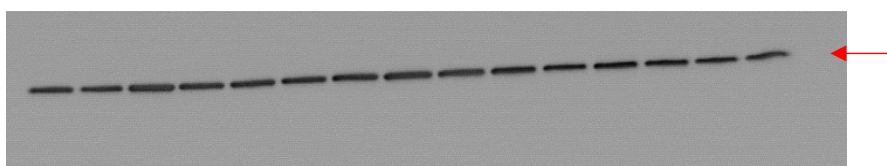

**Fig. 3B. Hsp72 protein**

Hippocampus

Gel #3

| band# from left | 1        | 2        | 3          | 4          | 5        | 6        | 7               | 8               | 9                   | 10                  |
|-----------------|----------|----------|------------|------------|----------|----------|-----------------|-----------------|---------------------|---------------------|
| group           | sham/sal | sham/sal | stress/sal | stress/sal | sham/IMI | sham/IMI | stress/IMI resp | stress/IMI resp | stress/IMI non-resp | stress/IMI non-resp |
| sample#         | 11       | 12       | 21         | 22         | 31       | 32       | 41              | 42              | 51                  | 52                  |

Hsp72 (Ms) ~70 kDa band indicated by the blue arrow

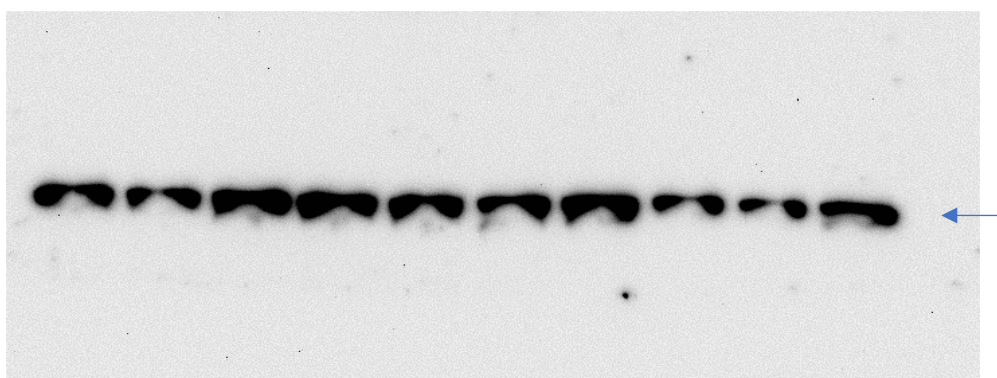

alpha-tubulin (Ms) ~55kDa band indicated by red arrow

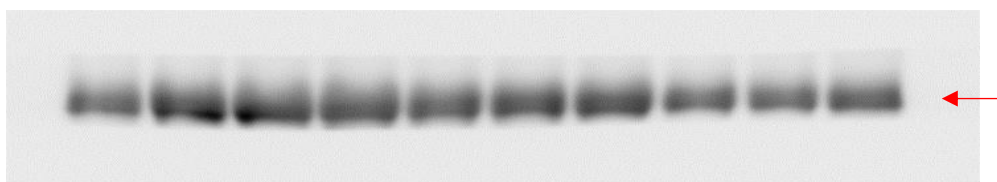

# Gel #4

| band# from left | 1        | 2        | 3          | 4          | 5        | 6        | 7               | 8               | 9                   | 10                  |
|-----------------|----------|----------|------------|------------|----------|----------|-----------------|-----------------|---------------------|---------------------|
| group           | sham/sal | sham/sal | stress/sal | stress/sal | sham/IMI | sham/IMI | stress/IMI resp | stress/IMI resp | stress/IMI non-resp | stress/IMI non-resp |
| sample#         | 13       | 14       | 23         | 24         | 33       | 34       | 43              | 44              | 53                  | 54                  |

Hsp72 (Ms) ~70 kDa band indicated by the blue arrow

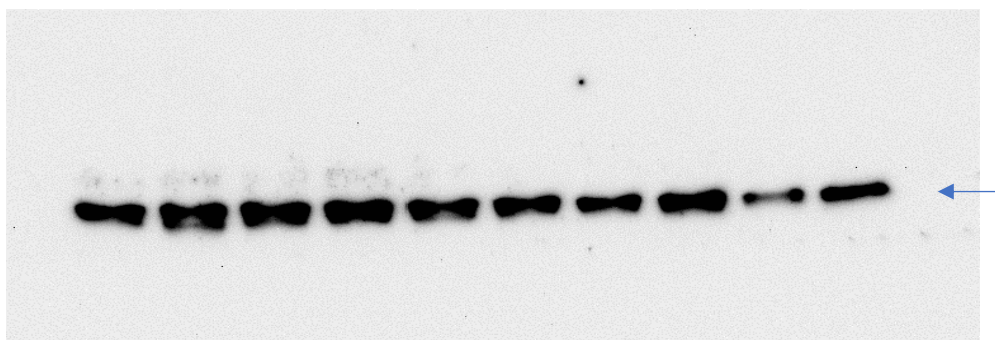

alpha-tubulin (Ms) ~55kDa band indicated by red arrow

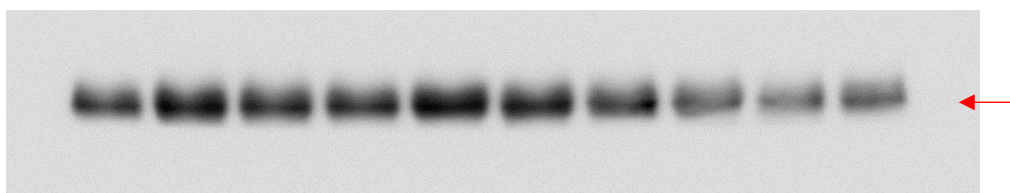

# Gel #5

| band# from left | 1        | 2        | 3          | 4          | 5        | 6        | 7               | 8               | 9                   | 10                  |
|-----------------|----------|----------|------------|------------|----------|----------|-----------------|-----------------|---------------------|---------------------|
| group           | sham/sal | sham/sal | stress/sal | stress/sal | sham/IMI | sham/IMI | stress/IMI resp | stress/IMI resp | stress/IMI non-resp | stress/IMI non-resp |
| sample#         | 15       | 16       | 25         | 26         | 35       | 36       | 45              | 46              | 55                  | 56                  |

Hsp72 (Ms) ~70 kDa band indicated by the blue arrow

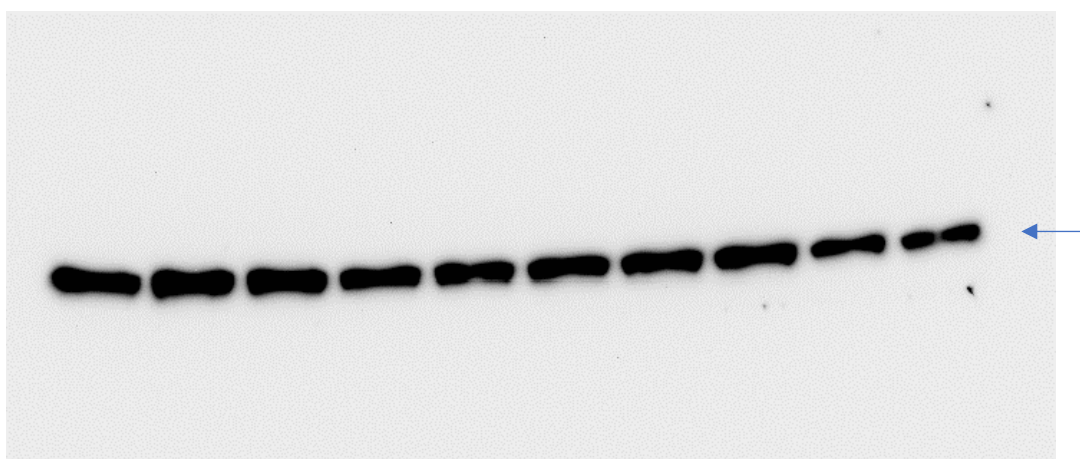

alpha-tubulin (Ms) ~55kDa band indicated by red arrow

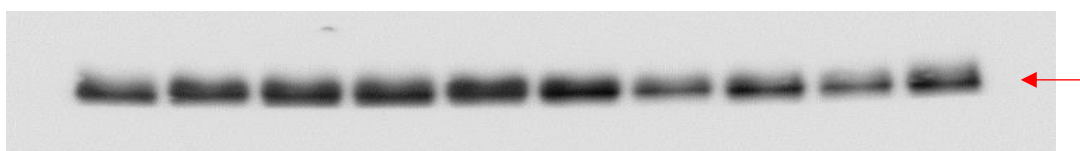

**Fig. 4B. Hsp90B protein**

Hippocampus

Gel #1

|                 |          |            |         |                 |                      |          |            |         |                 |                      |
|-----------------|----------|------------|---------|-----------------|----------------------|----------|------------|---------|-----------------|----------------------|
| band# from left | 1        | 2          | 3       | 4               | 5                    | 6        | 7          | 8       | 9               | 10                   |
| group           | sham/sal | stress/sal | sham/MI | stress/IMI resp | stress/IMI non- resp | sham/sal | stress/sal | sham/MI | stress/IMI resp | stress/IMI non- resp |
| sample#         | 11       | 21         | 31      | 41              | 51                   | 12       | 22         | 32      | 42              | 52                   |
| band# from left | 11       | 12         | 13      | 14              | 15                   | 16       | 17         | 18      | 19              | 20                   |
| group           | sham/sal | stress/sal | sham/MI | stress/IMI resp | stress/IMI non- resp | sham/sal | stress/sal | sham/MI | stress/IMI resp | stress/IMI non- resp |
| sample#         | 13       | 23         | 33      | 43              | 53                   | 14       | 24         | 34      | 44              | 54                   |
| band# from left | 21       | 22         | 23      | 24              | 25                   |          |            |         |                 |                      |
| group           | sham/sal | stress/sal | sham/MI | stress/IMI resp | stress/IMI non- resp |          |            |         |                 |                      |
| sample#         | 15       | 25         | 35      | 45              | 55                   |          |            |         |                 |                      |

Hsp90B (Ms) ~85kDa band indicated by blue arrow

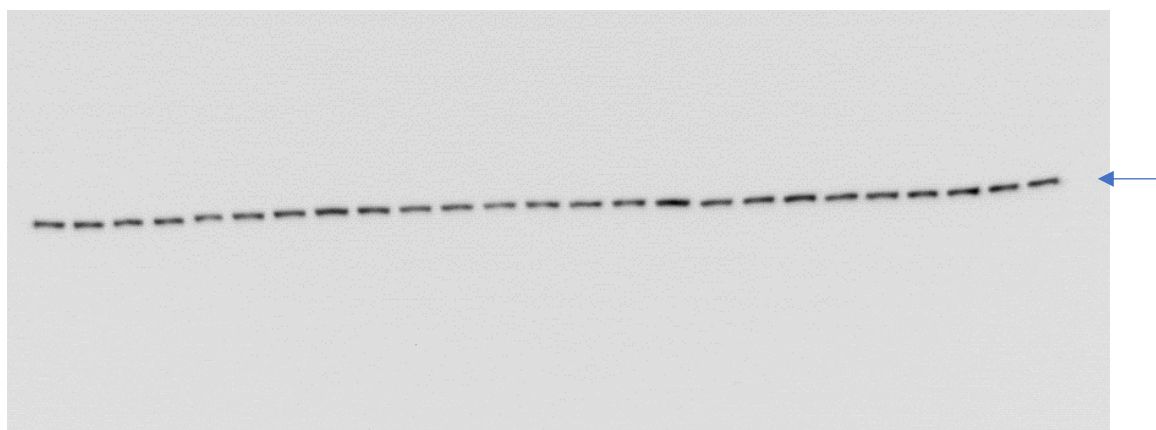

beta-actin (Ms) ~43kDa band indicated by red arrow

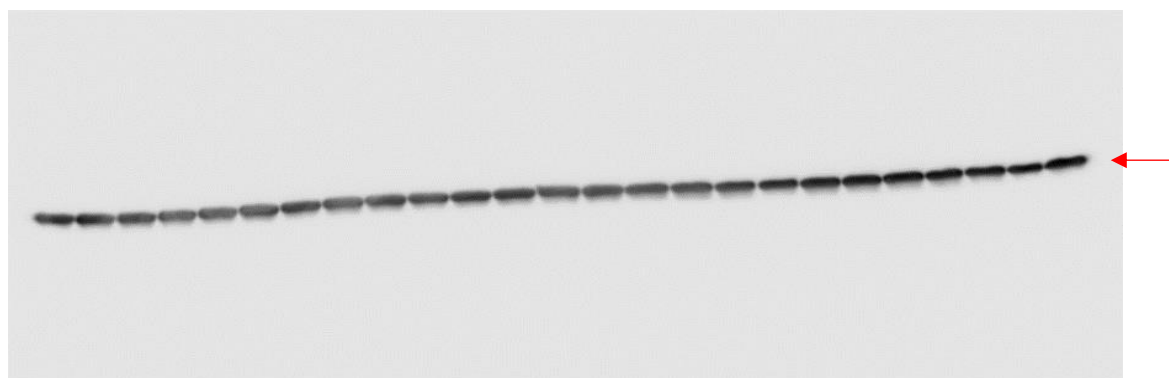

## Gel #2

|                 |          |            |          |                 |                      |          |            |          |                 |                      |
|-----------------|----------|------------|----------|-----------------|----------------------|----------|------------|----------|-----------------|----------------------|
| band# from left | 1        | 2          | 3        | 4               | 5                    | 6        | 7          | 8        | 9               | 10                   |
| group           | sham/sal | stress/sal | sham/IMI | stress/IMI resp | stress/IMI non- resp | sham/sal | stress/sal | sham/IMI | stress/IMI resp | stress/IMI non- resp |
| sample#         | 16       | 26         | 36       | 46              | 56                   | 17       | 27         | 37       | 47              | 57                   |

  

|                 |          |            |          |                 |                      |
|-----------------|----------|------------|----------|-----------------|----------------------|
| band# from left | 11       | 12         | 13       | 14              | 15                   |
| group           | sham/sal | stress/sal | sham/IMI | stress/IMI resp | stress/IMI non- resp |
| sample#         | 18       | 28         | 38       | 48              | 58                   |

Hsp90B (Ms) ~85kDa band indicated by blue arrow

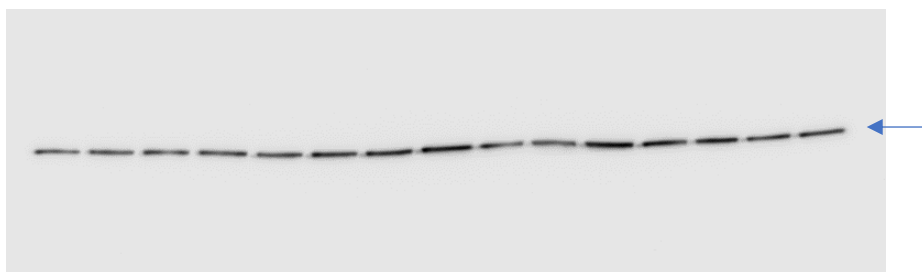

beta-actin (Ms) ~43kDa band indicated by red arrow

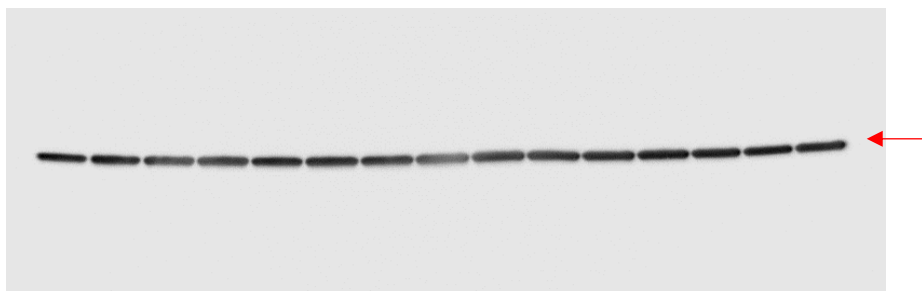

Supplement: Supplementary file 1 [file ijms-25-00243-s001.zip › Supplementary_Figure_S1.pdf]
