# Supplementary material for: Elevated Expression of HSP72 in the Prefrontal Cortex and Hippocampus of Rats Subjected to Chronic Mild Stress and Treated with Imipramine
Source: Int J Mol Sci. 2023 Dec 23;25(1):243. doi: 10.3390/ijms25010243 (PMC10779295; doi:10.3390/ijms25010243)
Supplement: Supplementary file 1 [file ijms-25-00243-s001.zip › Supplementary Tables S1-S3.pdf]

Elevated expression of HSP72 in the prefrontal cortex and hippocampus of rats subjected to chronic mild stress and treated with imipramine

Bielawski A.<sup>1</sup>, Zelek-Molik A.<sup>1</sup>, Rafa-Zabłocka K.<sup>1</sup>, Kowalska M.<sup>1</sup>, Gruca P.<sup>2</sup>, Papp M.<sup>2</sup> and Nalepa I.<sup>1</sup>

<sup>1</sup> Department of Brain Biochemistry, Maj Institute of Pharmacology, Polish Academy of Sciences, Kraków, Poland;

<sup>2</sup> Behavioral Pharmacology Laboratory, Maj Institute of Pharmacology, Polish Academy of Sciences, Kraków, Poland;

**Supplementary Table S1.** Lack of changes in expression of HSC70 mRNA in PFC and HIP of rats subjected to the CMS (stress) for 8 weeks and treated with IMI (10 mg/kg, ip) for 5 weeks determined by RTqPCR.

| Treatment          | HSC70 mRNA level<br>[% of sal/sham control $\pm$ SEM] <sup>1</sup> |                            |
|--------------------|--------------------------------------------------------------------|----------------------------|
|                    | PFC                                                                | HIP                        |
| sham/sal           | 100,00 $\pm$ 21,14                                                 | 100,00 $\pm$ 7,69          |
| stress/sal         | 88,95 $\pm$ 22,11                                                  | 107,79 $\pm$ 3,66          |
| sham/IMI           | 83,96 $\pm$ 14,87                                                  | 91,40 $\pm$ 6,75           |
| stress/IMI resp    | 96,63 $\pm$ 17,67                                                  | 97,95 $\pm$ 4,17           |
| stress/IMI nonresp | 79,81 $\pm$ 5,98                                                   | 107,40 $\pm$ 7,57          |
| 1 way ANOVA        | $F(4,25) = 0.88, p > 0.05$                                         | $F(4,25) = 1.23, p > 0.05$ |

<sup>1</sup> Results are expressed as a percent of control (sham/sal) group  $\pm$  standard error of mean (SEM); n = 6, stress/IMI resp – group of CMS rats that responded to IMI treatment (reversed anhedonia in sucrose test), stress/IMI nonresp – group of CMS rats nonresponding to IMI.

**Supplementary Table S2.** Lack of changes in expression of mRNAs of HSP90 family in the prefrontal cortex and HSP90A in the hippocampus of rats subjected to the CMS (stress) during 8 weeks and treated with IMI (10 mg/kg, ip) for 5 weeks determined by RTqPCR

| Treatment          | mRNAs level<br>[% of sal/sham control $\pm$ SEM] <sup>1</sup> |                                 |                                 |
|--------------------|---------------------------------------------------------------|---------------------------------|---------------------------------|
|                    | PFC                                                           | HIP                             |                                 |
|                    | HSP90A                                                        | HSP90B                          | HSP90A                          |
| sham/sal           | 100,00 $\pm$ 7,39                                             | 100,00 $\pm$ 5,20               | 100,00 $\pm$ 1,80               |
| stress/sal         | 100,80 $\pm$ 8,78                                             | 100,85 $\pm$ 5,86               | 104,98 $\pm$ 3,90               |
| sham/IMI           | 109,89 $\pm$ 7,37                                             | 101,33 $\pm$ 4,24               | 98,07 $\pm$ 3,59                |
| stress/IMI resp    | 101,45 $\pm$ 3,75                                             | 111,74 $\pm$ 6,95               | 102,90 $\pm$ 3,44               |
| stress/IMI nonresp | 97,86 $\pm$ 5,12                                              | 104,32 $\pm$ 6,17               | 100,62 $\pm$ 4,34               |
| 1 way ANOVA        | $F(4,25) = 0.47,$<br>$p > 0.05$                               | $F(4,25) = 1.29,$<br>$p > 0.05$ | $F(4,25) = 0.58,$<br>$p > 0.05$ |

<sup>1</sup> Results are expressed as a percent of control (sham/sal) group  $\pm$  standard error of mean (SEM); n = 6, stress/IMI resp – group of CMS rats that responded to IMI treatment (reversed anhedonia in sucrose test), stress/IMI nonresp – group of CMS rats nonresponding to IMI.

**Supplementary Table S3.** Lack of changes in mRNA expression of HSPA and HSPC families in Thal of rats subjected to the CMS (stress) for 8 weeks and treated with IMI (10 mg/kg, ip) for 5 weeks determined by RTqPCR.

| Treatment          | mRNAs level in <b>Thal</b><br>[% of sal/sham control $\pm$ SEM] <sup>1</sup> |                                            |                                            |                                            |
|--------------------|------------------------------------------------------------------------------|--------------------------------------------|--------------------------------------------|--------------------------------------------|
|                    | <b>HSP72</b>                                                                 | <b>HSC70</b>                               | <b>HSP90A</b>                              | <b>HSP90B</b>                              |
| sham/sal           | 100,00 $\pm$ 7,50                                                            | 100,00 $\pm$ 3,20                          | 100,00 $\pm$ 11,30                         | 100,00 $\pm$ 2,89                          |
| stress/sal         | 95,60 $\pm$ 8,43                                                             | 109,00 $\pm$ 4,50                          | 105,99 $\pm$ 5,38                          | 99,01 $\pm$ 3,87                           |
| sham/IMI           | 99,80 $\pm$ 4,93                                                             | 101,90 $\pm$ 4,70                          | 108,00 $\pm$ 4,86                          | 101,84 $\pm$ 4,12                          |
| stress/IMI resp    | 97,07 $\pm$ 9,94                                                             | 112,00 $\pm$ 9,10                          | 101,25 $\pm$ 7,51                          | 97,88 $\pm$ 8,39                           |
| stress/IMI nonresp | 115,74 $\pm$ 8,34                                                            | 99,00 $\pm$ 5,00                           | 100,72 $\pm$ 5,32                          | 99,01 $\pm$ 7,58                           |
| <i>1 way ANOVA</i> | <i>F</i> (4,25) = 1.05,<br><i>p</i> > 0.05                                   | <i>F</i> (4,25) = 1.04,<br><i>p</i> > 0.05 | <i>F</i> (4,25) = 0.23,<br><i>p</i> > 0.05 | <i>F</i> (4,25) = 0.07,<br><i>p</i> > 0.05 |

<sup>1</sup>Results are expressed as a percent of control (sham/sal) group  $\pm$  standard error of mean (SEM); n = 6, stress/IMI resp – group of CMS rats that responded to IMI treatment (reversed anhedonia in sucrose test), stress/IMI nonresp – group of CMS rats nonresponding to IMI.
